# Supplementary material
Source: PubMed Central journal article supplement (PMC384769)

**A.**

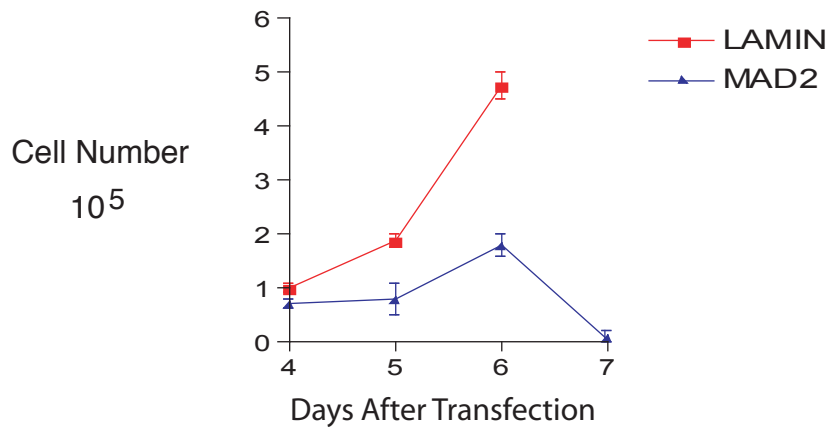

**B.**

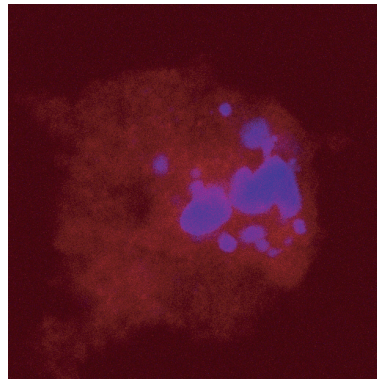

**C.**

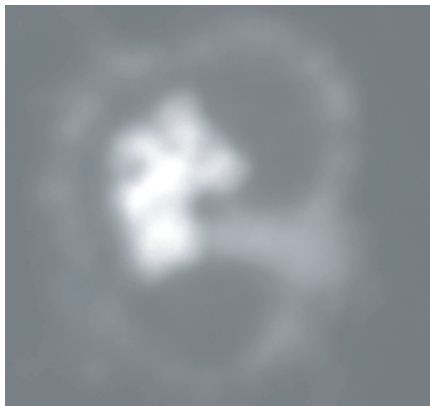

**D.**

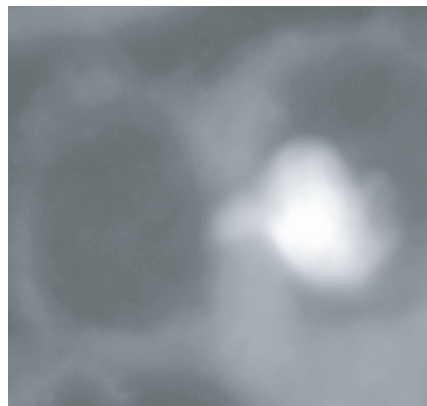

Supplement: pnas_101_13_4459__2.pdf [file pnas_101_13_4459__2.pdf]

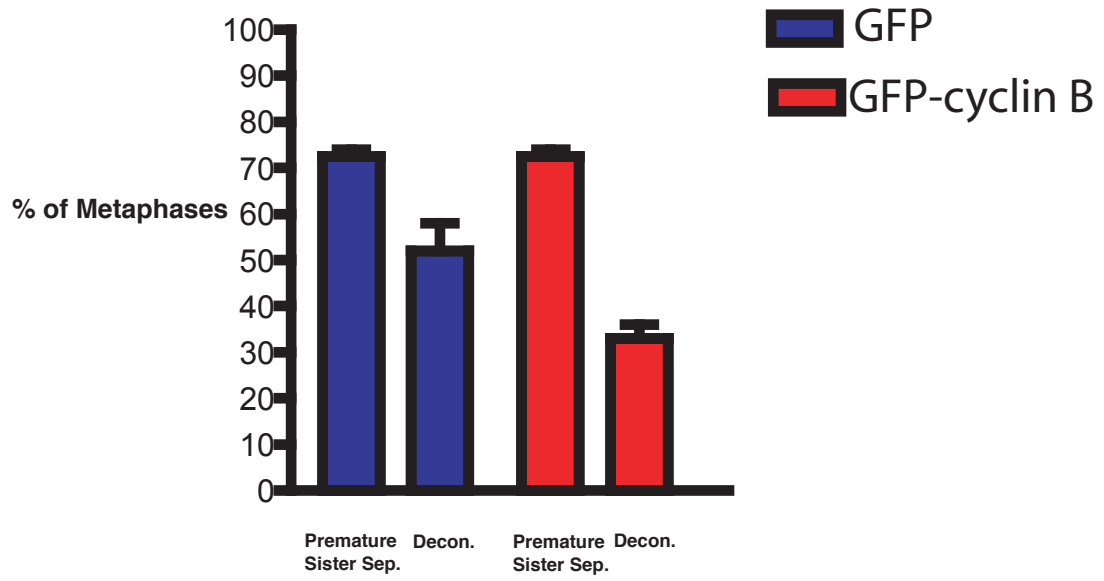

Supplement: pnas_101_13_4459__4.pdf [file pnas_101_13_4459__4.pdf]

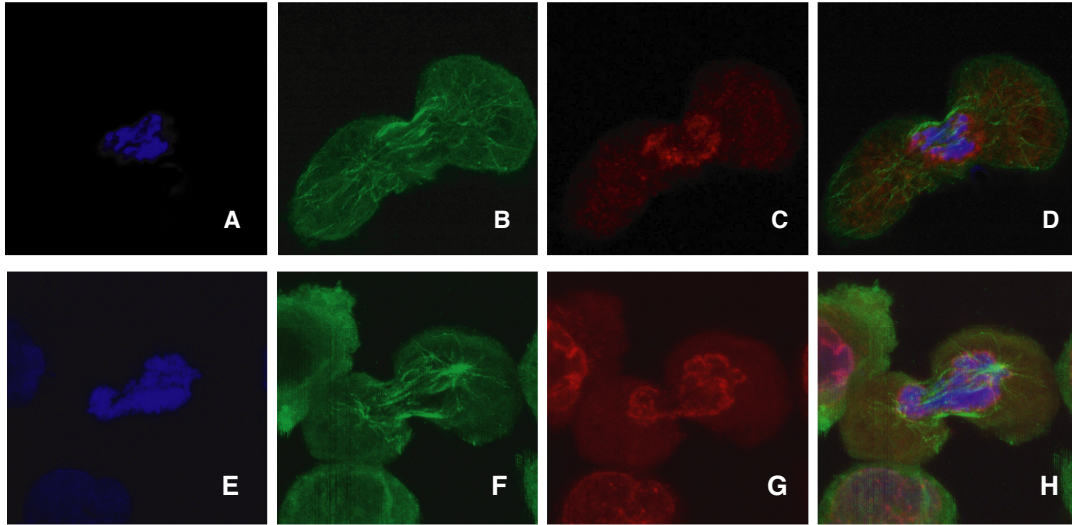

DAPI

Beta Tubulin

Nup 358

Merge

Supplement: pnas_101_13_4459__6.pdf [file pnas_101_13_4459__6.pdf]

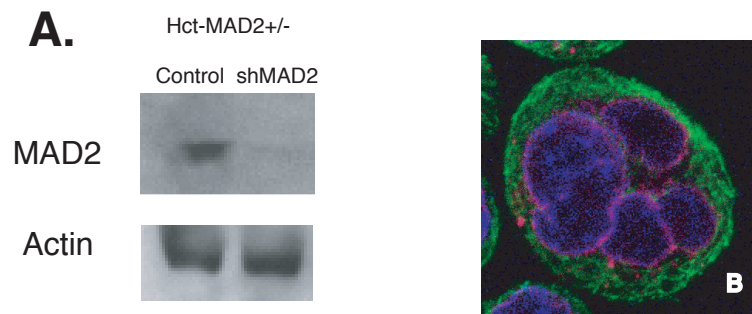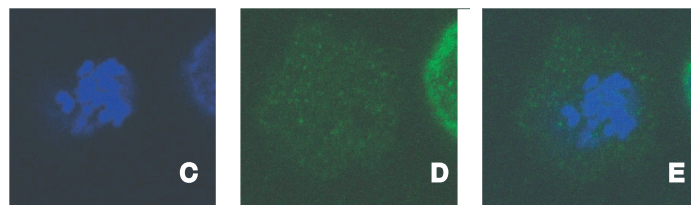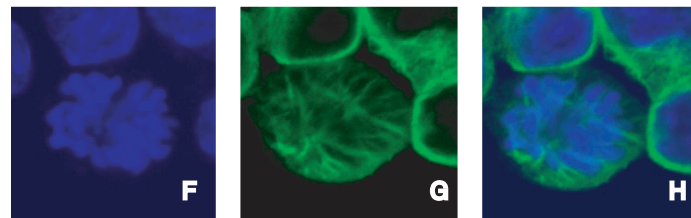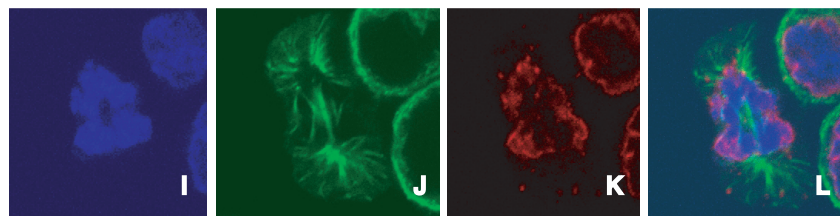

**M.**

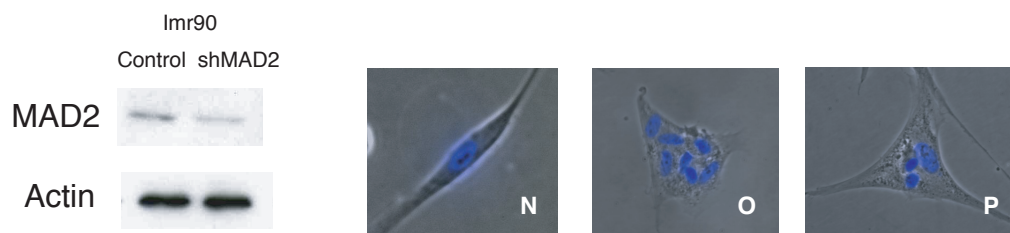

Supplement: pnas_101_13_4459__8.pdf [file pnas_101_13_4459__8.pdf]
